# Supplementary material for: New Oligonucleotide Probes for ND-FISH Analysis to Identify Barley Chromosomes and to Investigate Polymorphisms of Wheat Chromosomes
Source: PubMed Central journal article supplement (PMC5192494; doi:10.3390/genes7120118), 2016-12-05
Supplement: genes-07-00118-s001.pdf [file genes-07-00118-s001.pdf]

# Supplementary Materials: New Oligonucleotide Probes for ND-FISH Analysis to Identify Barley Chromosomes and to Investigate Polymorphisms of Wheat Chromosomes

Shuyao Tang, Ling Qiu, Zhiqiang Xiao, Shulan Fu and Zongxiang Tang

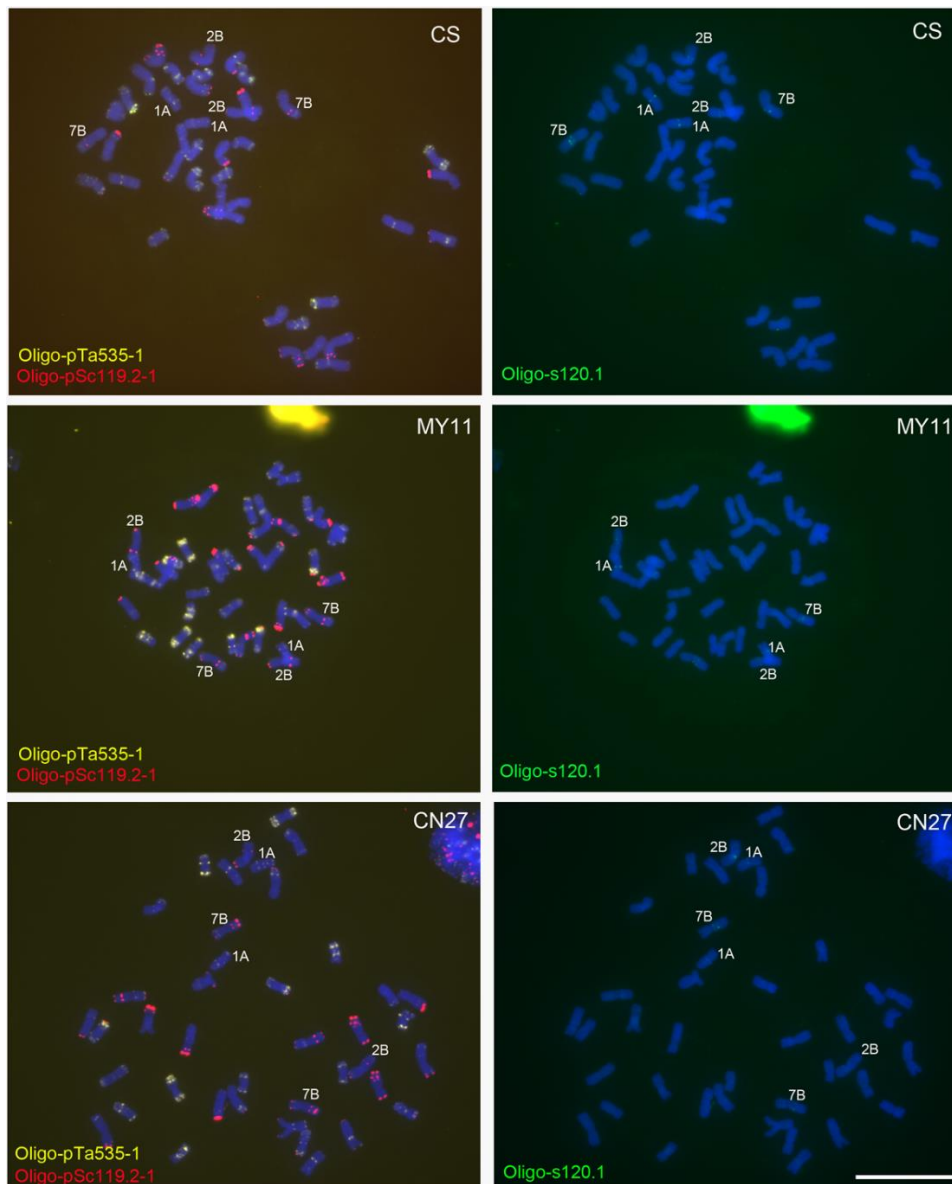

**Figure S1.** Oligo-s120.1 (green) combined with Oligo-pTa535-1 (yellow) and Oligo-pSc119.2-1 (red) was used as probes for non-denaturing fluorescence in situ hybridization (ND-FISH) analysis of root tip metaphase chromosomes of wheat varieties Chinese Spring (CS), Mianyang 11 (MY11), and Chuannong 27 (CN27). Only the chromosomes with signals of Oligo-s120.1 were marked. Chromosomes were counterstained with 4',6-diamidino-2-phenylindole (DAPI) (blue). Scale bar: 10  $\mu$ m.

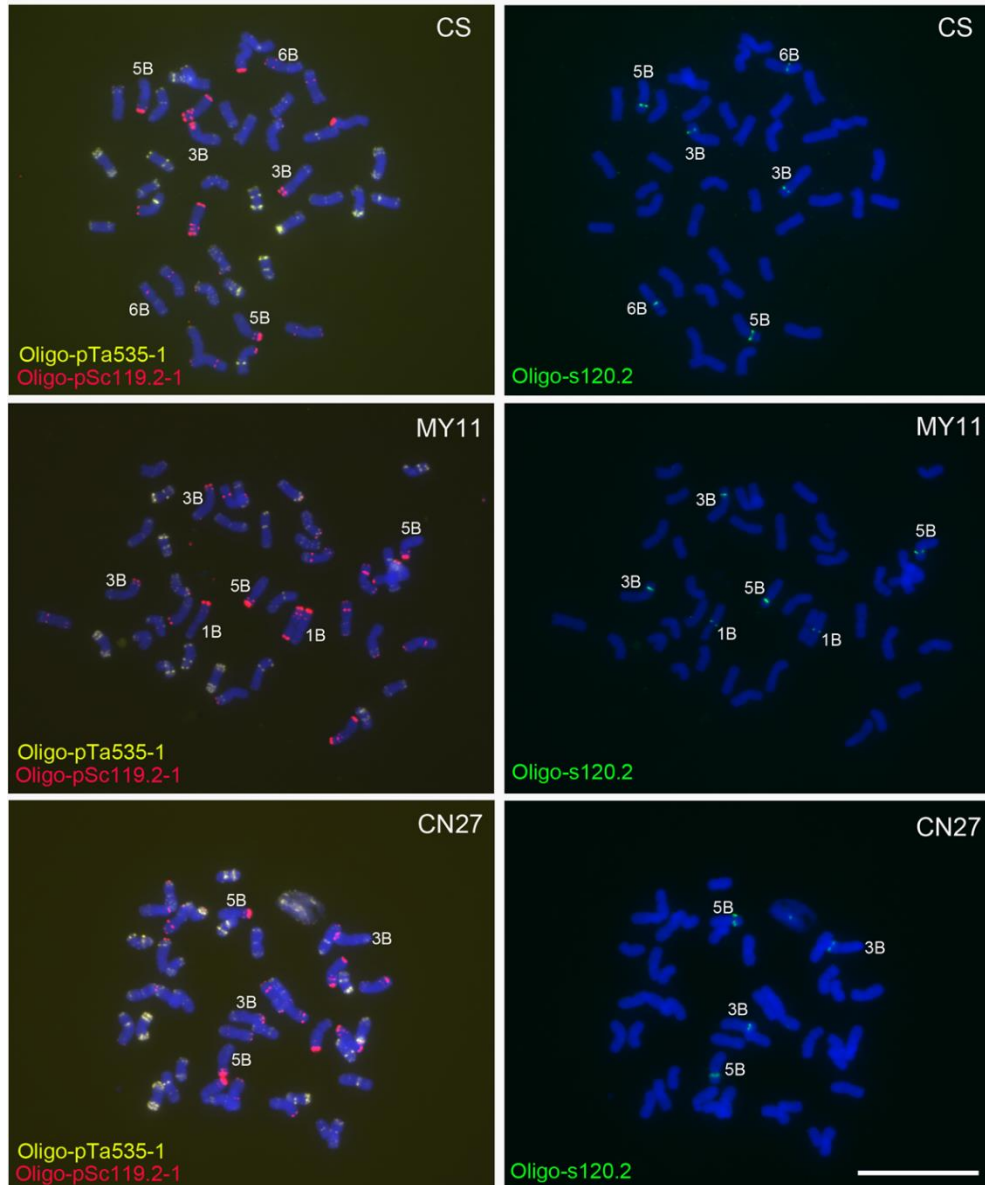

**Figure S2.** Oligo-s120.2 (green) combined with Oligo-pTa535-1 (yellow) and Oligo-pSc119.2-1 (red) was used as probes for ND-FISH analysis of root tip metaphase chromosomes of wheat varieties CS, MY11 and CN27. Only the chromosomes with signals of Oligo-s120.2 were marked. Chromosomes were counterstained with DAPI (blue). Scale bar: 10  $\mu$ m.

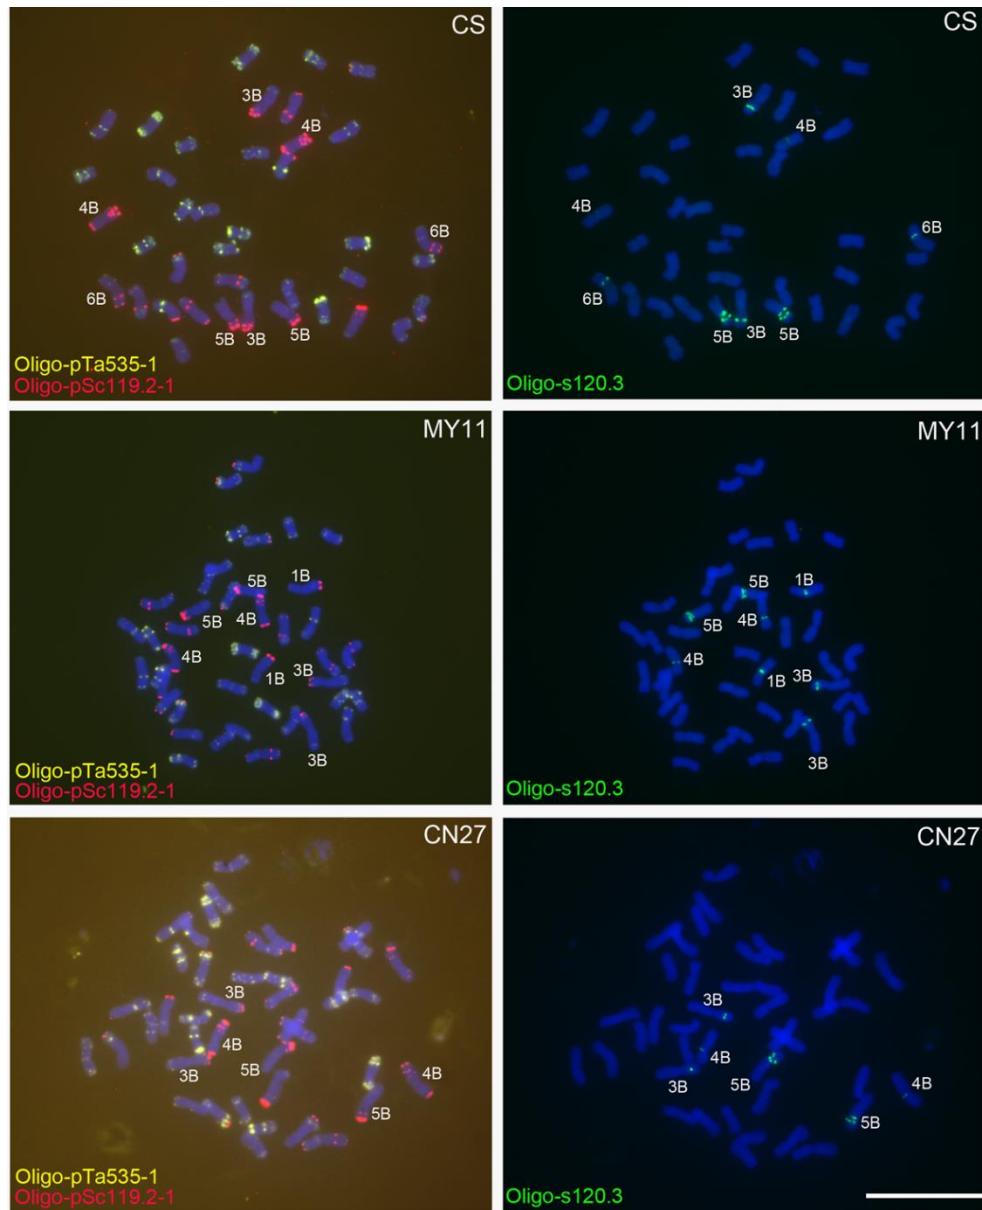

**Figure S3.** Oligo-s120.3 (green) combined with Oligo-pTa535-1 (yellow) and Oligo-pSc119.2-1 (red) was used as probes for ND-FISH analysis of root tip metaphase chromosomes of wheat varieties CS, MY11 and CN27. Only the chromosomes with signals of Oligo-s120.3 were marked. Chromosomes were counterstained with DAPI (blue). Scale bar: 10  $\mu$ m.

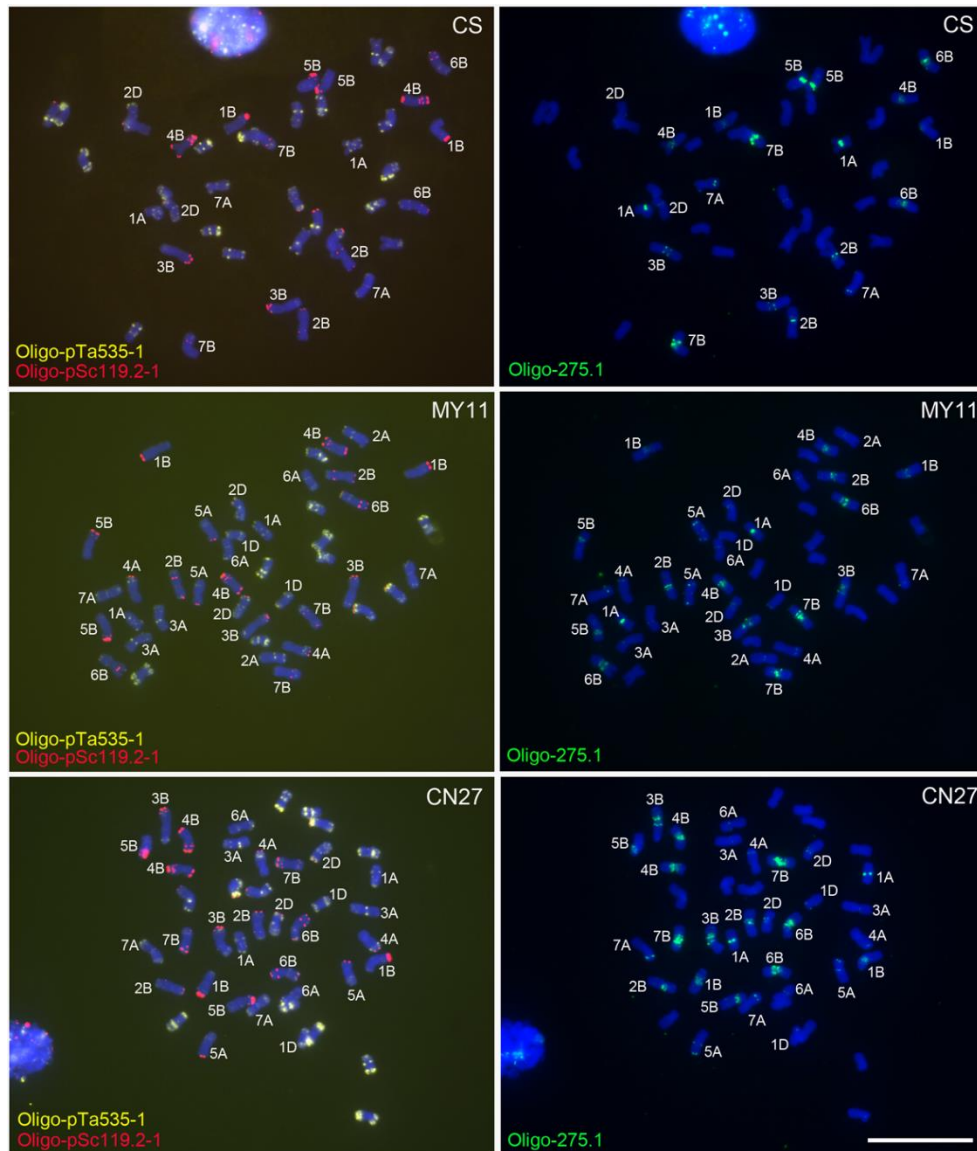

**Figure S4.** Oligo-275.1 (green) combined with Oligo-pTa535-1 (yellow) and Oligo-pSc119.2-1 (red) was used as probes for ND-FISH analysis of root tip metaphase chromosomes of wheat varieties CS, MY11 and CN27. Only the chromosomes with signals of Oligo-275.1 were marked. Chromosomes were counterstained with DAPI (blue). Scale bar: 10  $\mu$ m.

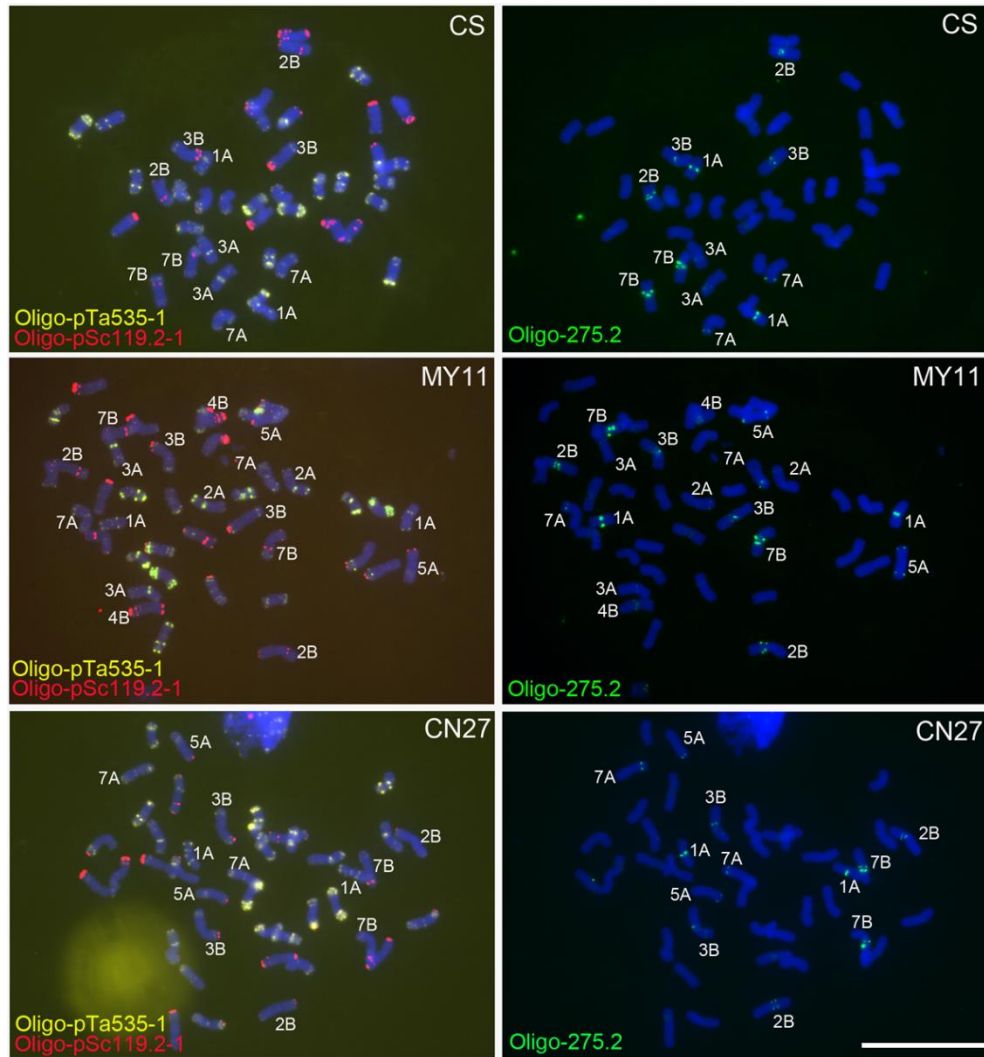

**Figure S5.** Oligo-275.2 (green) combined with Oligo-pTa535-1 (yellow) and Oligo-pSc119.2-1 (red) was used as probes for ND-FISH analysis of root tip metaphase chromosomes of wheat varieties CS, MY11 and CN27. Only the chromosomes with signals of Oligo-275.2 were marked. Chromosomes were counterstained with DAPI (blue). Scale bar: 10  $\mu$ m.

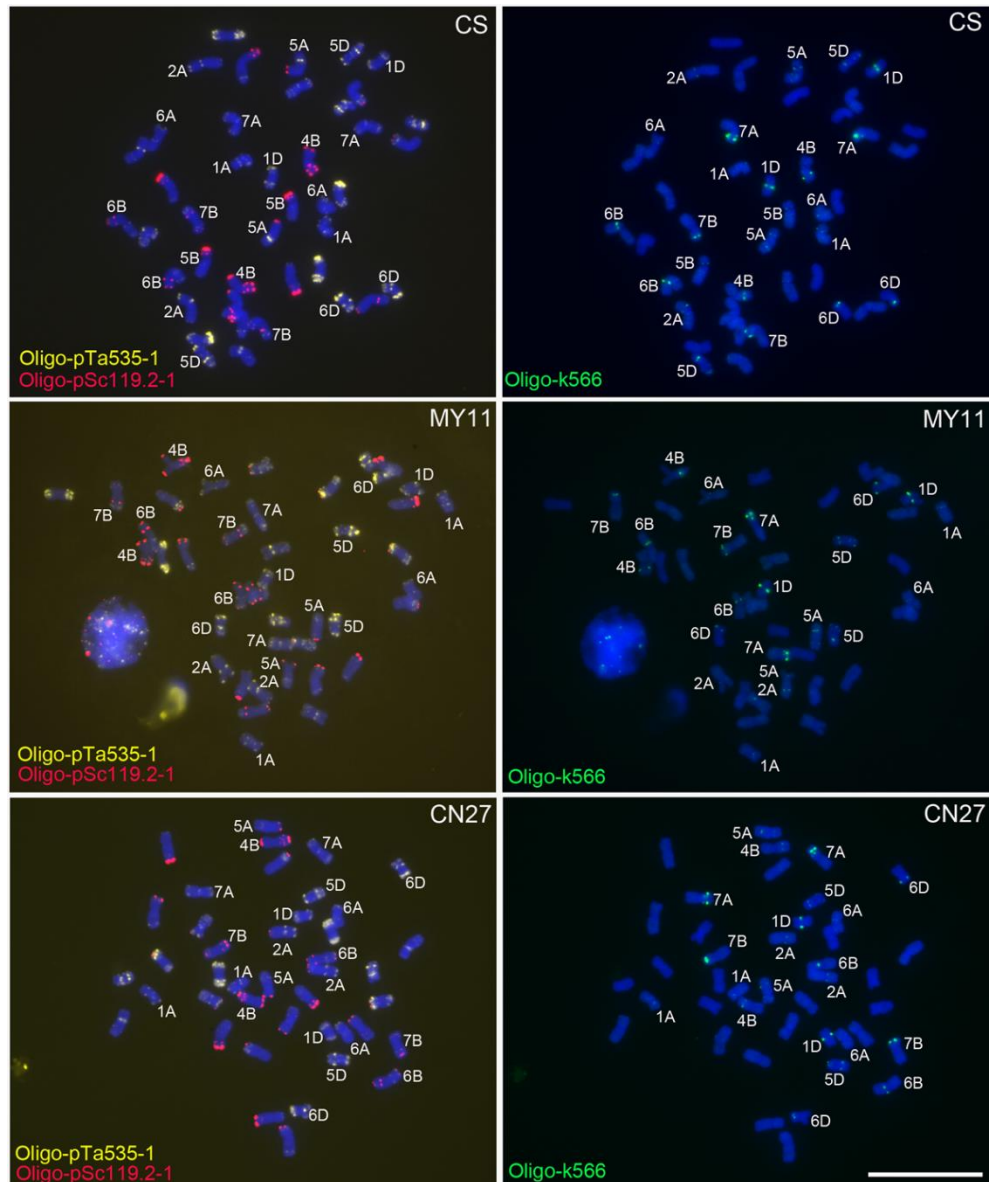

**Figure S6.** Oligo-k566 (green) combined with Oligo-pTa535-1 (yellow) and Oligo-pSc119.2-1 (red) was used as probes for ND-FISH analysis of root tip metaphase chromosomes of wheat varieties CS, MY11 and CN27. Only the chromosomes with signals of Oligo-k566 were marked. Chromosomes were counterstained with DAPI (blue). Scale bar: 10  $\mu$ m.

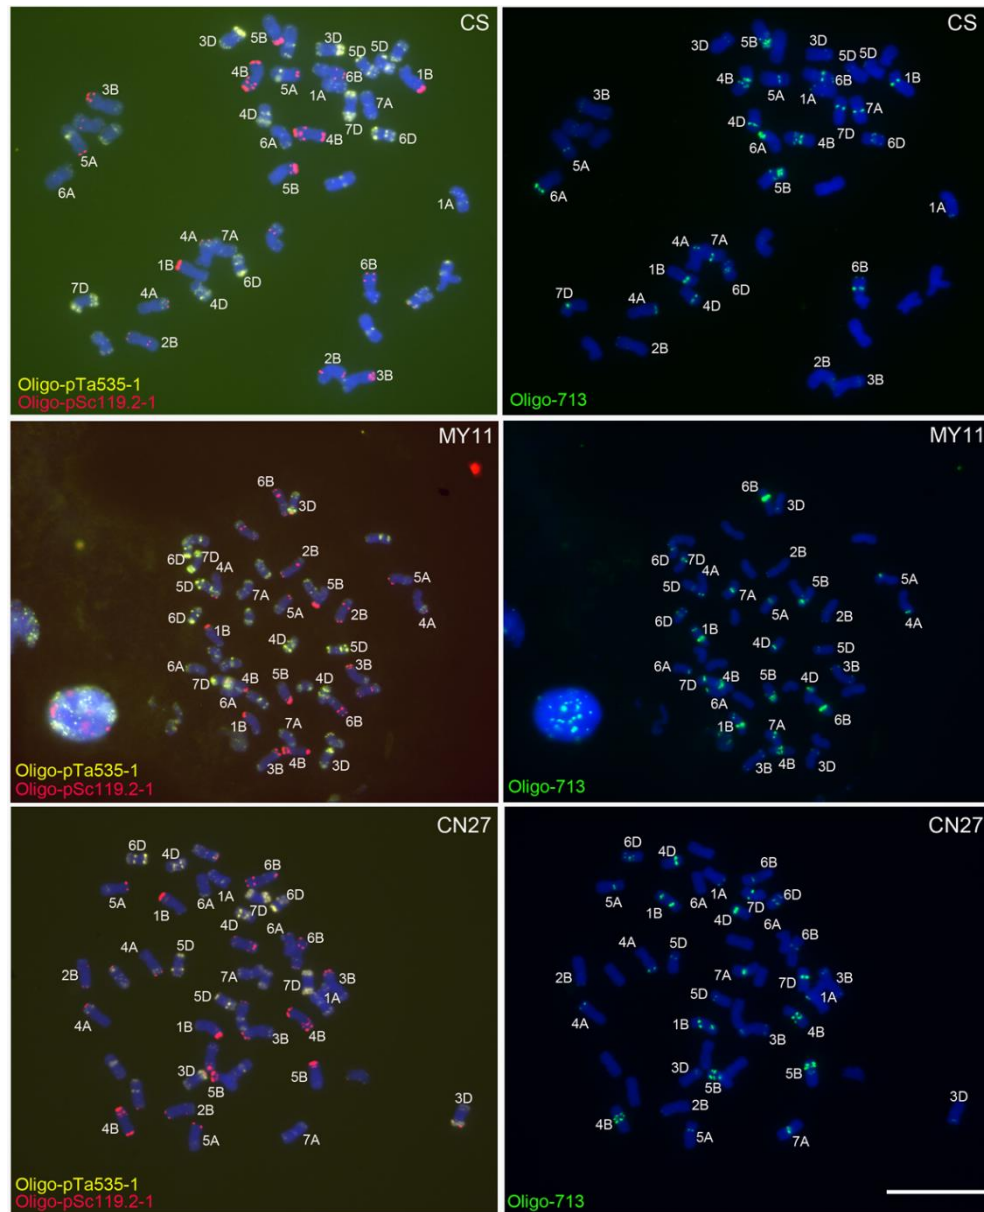

**Figure S7.** Oligo-713 (green) combined with Oligo-pTa535-1 (yellow) and Oligo-pSc119.2-1 (red) was used as probes for ND-FISH analysis of root tip metaphase chromosomes of wheat varieties CS, MY11 and CN27. Only the chromosomes with signals of Oligo-713 were marked. Chromosomes were counterstained with DAPI (blue). Scale bar: 10  $\mu$ m.

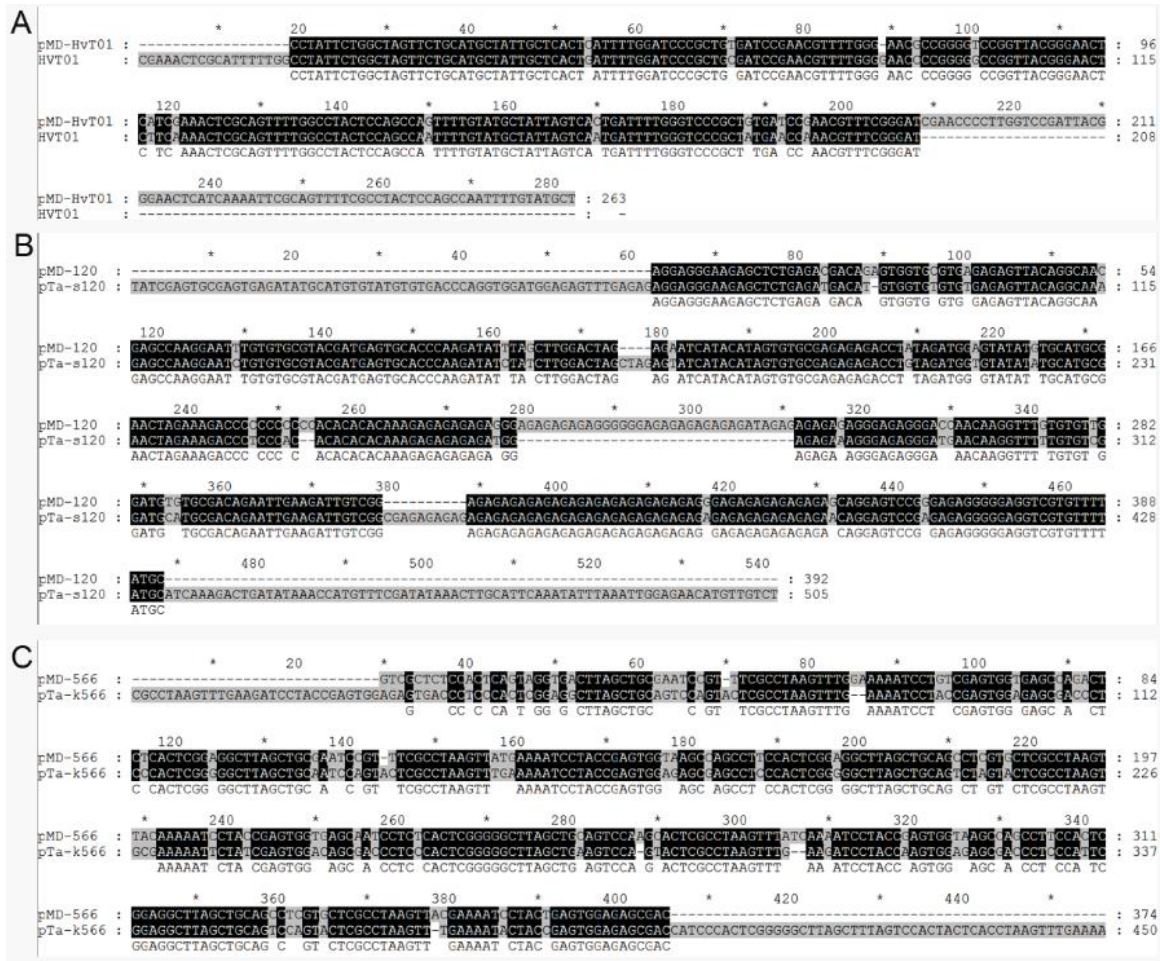

**Figure S8.** Sequence alignment between cloned repetitive sequences and their corresponding original repetitive sequences: (A) alignment between pMD-HvT01 and HVT01; (B) alignment between pMD-120 and pTa-s120; and (C) alignment between pMD-566 and pTa-k566.

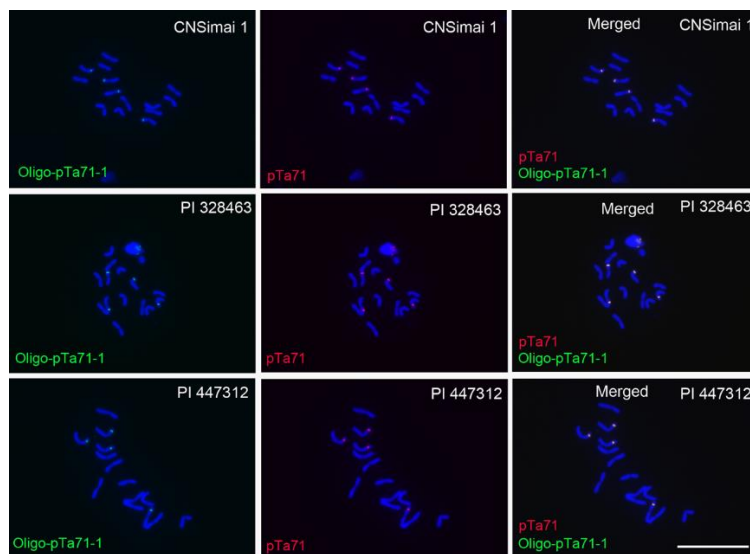

**Figure S9.** Oligo-pTa71-1 (green) and pTa71 (red) were used as probes for denaturing FISH analysis of root tip metaphase chromosomes of three barley varieties. Chromosomes were counterstained with DAPI (blue). Scale bar: 10  $\mu$ m.



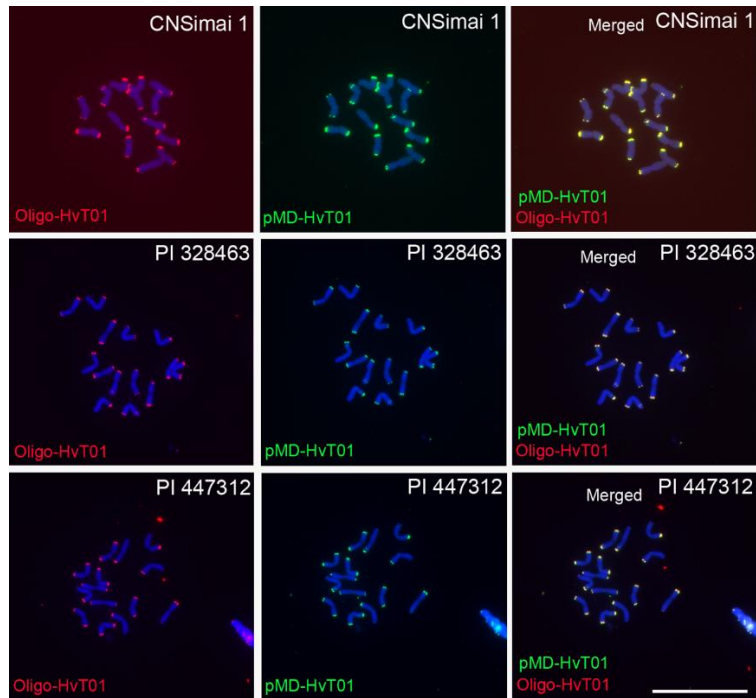

**Figure S10.** Oligo-HvT01 (red) and pMD-HvT01 (green) were used as probes for denaturing FISH analysis of root tip metaphase chromosomes of three barley varieties. Chromosomes were counterstained with DAPI (blue). Scale bar: 10  $\mu$ m.

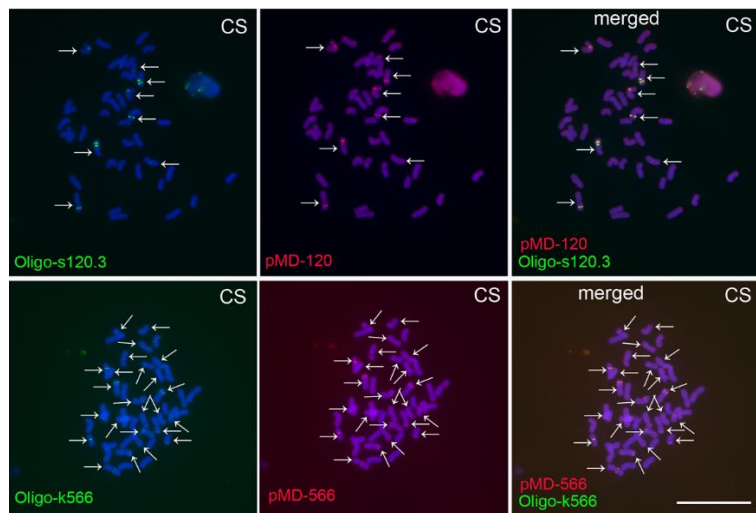

**Figure S11.** Oligo-s120.3 (green), Oligo-k566 (green), pMD-120 (red) and pMD-566 (red) were used as probes for denaturing FISH analysis of root tip metaphase chromosomes of wheat CS. Arrows indicate the chromosomes with hybridization signals. Chromosomes were counterstained with DAPI (blue). Scale bar: 10  $\mu$ m.
